# Supplementary material for: Polyadenylation-Dependent Control of Long Noncoding RNA Expression by the Poly(A)-Binding Protein Nuclear 1
Source: PLoS Genet. 2012 Nov 15;8(11):e1003078. doi: 10.1371/journal.pgen.1003078 (PMC3499365; doi:10.1371/journal.pgen.1003078)
Supplement: Table S2 — Table showing all protein-coding genes with RPKM >1 in a least one sample, not overlapping ncRNA genes, displaying more than 2 fold change in expression: UCSC genes (Based on RefSeq, UniProt, GenBank, CCDS and Comparative Genomics), with a protein ID (Uniprot, RefSeq protein or SwissProt), after removal of redundant genes. (XLS) [file pgen.1003078.s013.xls]

## Sheet: Sheet1
Table S2. Protein-coding genes with RPKM > 1 in a least one sample, not overlapping ncRNA genes, displaying more than 2 fold change in expression: UCSC genes (Based on RefSeq, UniProt, GenBank, CCDS and Comparative Genomics), with a protein ID (Uniprot, RefSeq protein or SwissProt), after removal of redundant genes.
chr	start	end	gene	length	reads_NT4	reads_si6	sumReads	RPKM_NT4	RPKM_si6	log_FC	FC
chr17	39657232	39661865	KRT13	2219	77	532	609	0.2028	1.4306	2.8188	7.0558
chr6	53512699	53530506	KLHL31	5742	264	1269	1533	0.2686	1.3187	2.2954	4.9089
chr7	138391039	138482941	ATP6V0A4	3356	468	1984	2452	0.8148	3.5276	2.1141	4.3293
chr6	170140214	170151638	TCTE3	747	61	236	297	0.4771	1.8851	1.9822	3.951
chr12	11174271	11175170	TAS2R19	899	52	190	242	0.338	1.2611	1.8997	3.7314
chr19	18496967	18499986	GDF15	1200	264	963	1227	1.2854	4.7885	1.8973	3.7252
chr17	66264337	66287405	SLC16A6	2784	1335	4576	5911	2.8018	9.8078	1.8076	3.5005
chr2	902822	906011	C2orf90	3189	389	1319	1708	0.7127	2.468	1.7919	3.4627
chr17	79276623	79283048	C17orf55	2970	883	2724	3607	1.7371	5.4727	1.6556	3.1504
chr12	10310898	10324790	OLR1	2538	2546	7483	10029	5.8613	17.5929	1.5857	3.0015
chr12	11182985	11184006	TAS2R31	1021	82	240	322	0.4693	1.4026	1.5797	2.989
chr1	761586	762902	RP11-206L10.16-001	1316	328	950	1278	1.4563	4.3075	1.5645	2.9578
chr2	233320832	233324740	ALPI	2630	2596	7506	10102	5.7674	17.0297	1.5621	2.9528
chr2	233271551	233275422	ALPPL2	2492	653	1888	2541	1.5311	4.5207	1.562	2.9527
chr7	100813777	100823557	C7orf52	3763	353	998	1351	0.5481	1.5825	1.5297	2.8872
chr6	116571132	116575261	TSPYL4	4129	2375	6044	8419	3.3608	8.7344	1.3779	2.5989
chr2	233243347	233247597	ALPP	2877	965	2447	3412	1.9598	5.0751	1.3727	2.5896
chr1	41154751	41157933	LOC100130557	3182	1590	3775	5365	2.9196	7.079	1.2778	2.4246
chr9	91150015	91190703	NXNL2	1628	174	394	568	0.6245	1.4441	1.2094	2.3124
chr4	15683351	15692062	LOC285550	4377	1484	3352	4836	1.981	4.5696	1.2058	2.3067
chr1	23695463	23698278	C1orf213	2815	445	965	1410	0.9237	2.0455	1.147	2.2146
chr16	3062456	3064506	CLDN9	2050	168	363	531	0.4788	1.0566	1.1418	2.2066
chr19	49316273	49339934	HSD17B14	1237	497	1072	1569	2.3475	5.171	1.1393	2.2027
chr3	52863875	52869318	MUSTN1	1624	234	504	738	0.8419	1.8518	1.1372	2.1996
chr19	14183687	14185873	BC000492	2186	290	621	911	0.7751	1.6951	1.1289	2.1868
chr11	57151266	57158130	PRG2	1038	1732	3697	5429	9.7494	21.2523	1.1242	2.1799
chr17	39775691	39780882	KRT17	2012	406	864	1270	1.179	2.5624	1.1199	2.1733
chr16	89724209	89737675	C16orf55	5547	2641	5579	8220	2.7819	6.0014	1.1092	2.1573
chr17	5082830	5095178	ZNF594	4877	2911	6060	8971	3.4875	7.4144	1.0881	2.126
chr12	11148560	11150474	TAS2R20	1914	292	605	897	0.8914	1.8861	1.0813	2.1159
chr5	180683387	180688119	TRIM52	2226	2158	4465	6623	5.6644	11.9688	1.0793	2.113
chr1	241792168	241799232	CHML	7064	16405	33802	50207	13.5692	28.5526	1.0733	2.1042
chr17	32582295	32584218	CCL2	745	125	257	382	0.9804	2.0584	1.0702	2.0997
chr3	52444526	52457656	PHF7	2275	456	921	1377	1.1711	2.4156	1.0445	2.0626
chr19	21541734	21571383	ZNF738	11720	1129	2277	3406	0.5629	1.1593	1.0424	2.0597
chr16	67918780	67920270	NRN1L	632	90	180	270	0.8321	1.6995	1.0303	2.0425
chr2	101964815	102003965	CREG2	3488	434	866	1300	0.727	1.4815	1.027	2.0378
chr10	38383274	38412276	ZNF37A	7016	6229	12412	18641	5.1875	10.5562	1.025	2.0349
chrX	19007426	19140677	GPR64	4773	6721	13293	20014	8.2276	16.6182	1.0142	2.0198
chr8	143761874	143764142	PSCA	1019	546	1078	1624	3.1307	6.3125	1.0117	2.0163
chrX	48928819	48931662	PRAF2	1261	2398	1173	3571	11.1112	5.5506	-1.0013	0.4995
chr16	2521499	2524145	NTN3	1985	913	445	1358	2.6874	1.3377	-1.0065	0.4978
chr17	73083821	73102246	SLC16A5	2619	5738	2786	8524	12.8013	6.3474	-1.012	0.4958
chr8	124191286	124222317	FAM83A	5248	2169	1050	3219	2.4149	1.1938	-1.0163	0.4944
chr17	74722924	74729961	C17orf95	1162	4697	2273	6970	23.618	11.672	-1.0168	0.4942
chr7	98992589	99006292	PDAP1	2382	15912	7680	23592	39.0311	19.2386	-1.0206	0.4929
chr5	34017963	34043317	C1QTNF3	3896	831	401	1232	1.2463	0.6142	-1.0209	0.4928
chr17	8191988	8193408	RANGRF	1145	4418	2130	6548	22.5449	11.1001	-1.0222	0.4924
chr11	126139054	126148026	FOXRED1	2442	10088	4839	14927	24.1372	11.824	-1.0295	0.4899
chr19	46001730	46005762	FLJ40125	1828	361	173	534	1.1539	0.5647	-1.0309	0.4894
chr19	49838427	49843859	CD37	3577	1909	913	2822	3.1183	1.523	-1.0338	0.4884
chr1	901876	910482	PLEKHN1	2554	647	309	956	1.4802	0.7219	-1.0358	0.4877
chr17	58029723	58042117	RNFT1	2915	2039	973	3012	4.087	1.9917	-1.037	0.4873
chr19	49834803	49843559	AK097351	684	490	232	722	4.1857	2.0239	-1.0483	0.4835
chr3	49449638	49453908	TCTA	2146	1781	843	2624	4.8491	2.344	-1.0488	0.4834
chr22	24094933	24096630	VPREB3	581	235	110	345	2.3633	1.1297	-1.0648	0.478
chr20	34203808	34208965	SPAG4	1452	1747	814	2561	7.03	3.3451	-1.0715	0.4758
chr2	119981383	120023225	STEAP3	4582	6036	2800	8836	7.697	3.6463	-1.0779	0.4737
chr15	66840538	66858317	LCTL	2248	1278	591	1869	3.3217	1.5687	-1.0823	0.4723
chr6	34845554	34855819	TAF11	1533	4615	2131	6746	17.5897	8.2946	-1.0845	0.4716
chr12	49741040	49745683	DNAJC22	2287	1542	711	2253	3.9395	1.8551	-1.0866	0.4709
chr17	80395002	80398408	AK297272	1139	1207	556	1763	6.1917	2.9128	-1.088	0.4704
chr18	34366471	34409158	C18orf10	3067	9978	4572	14550	19.0089	8.895	-1.0956	0.4679
chr1	79115476	79129761	IFI44	2524	542	248	790	1.2547	0.5863	-1.0976	0.4673
chr5	141303384	141321611	KIAA0141	4957	13407	6104	19511	15.803	7.3477	-1.1048	0.465
chr11	537521	554915	LRRC56	2773	684	310	994	1.4412	0.6671	-1.1114	0.4628
chr2	11295539	11318996	PQLC3	1784	1138	514	1652	3.7271	1.7192	-1.1163	0.4613
chr20	43560819	43587797	C20orf119	2247	6144	2774	8918	15.9763	7.3664	-1.1169	0.4611
chr6	159057505	159065740	DYNLT1	695	4193	1888	6081	35.2507	16.2095	-1.1208	0.4598
chr19	48835145	48867186	UNQ5922	3206	1827	821	2648	3.3297	1.528	-1.1237	0.4589
chr10	44282859	44285865	HNRPA3	3006	1115	501	1616	2.1673	0.9945	-1.1238	0.4589
chr16	2198144	2204140	RAB26	1804	16692	7483	24175	54.063	24.751	-1.1272	0.4578
chr17	40341105	40346550	GHDC	2997	4440	1986	6426	8.6561	3.9541	-1.1304	0.4568
chr1	46153846	46160108	TMEM69	1471	3961	1767	5728	15.7333	7.1677	-1.1342	0.4556
chr6	28092386	28097854	ZSCAN16	1905	954	424	1378	2.926	1.3281	-1.1396	0.4539
chr16	2880172	2882284	ZG16B	827	752	334	1086	5.313	2.4099	-1.1406	0.4536
chr1	151313115	151319769	RFX5	3618	18773	8294	27067	30.3175	13.6788	-1.1482	0.4512
chr17	10616639	10633646	TMEM220	3091	764	337	1101	1.4442	0.6506	-1.1505	0.4505
chr1	70820492	70833703	HHLA3	949	1007	444	1451	6.2	2.7917	-1.1511	0.4503
chr22	21369441	21382302	P2RX6	3543	683	300	983	1.1264	0.5052	-1.1566	0.4486
chr8	145691737	145699498	KIFC2	3335	19789	8666	28455	34.6702	15.5052	-1.1609	0.4472
chr22	36622255	36636000	APOL2	2892	3149	1371	4520	6.3621	2.8287	-1.1694	0.4446
chr13	103436631	103451404	KDELC1	2249	2682	1163	3845	6.9678	3.0856	-1.1751	0.4428
chr17	27030533	27038872	PROCA1	1728	745	320	1065	2.5191	1.105	-1.1889	0.4387
chr1	46159999	46216485	IPP	3439	2023	865	2888	3.4371	1.5009	-1.1954	0.4367
chr3	50337320	50349812	HYAL1	3108	4309	1842	6151	8.1007	3.5364	-1.1958	0.4366
chr7	150745604	150749843	ACCN3	2088	2584	1103	3687	7.2309	3.1521	-1.1979	0.4359
chr1	206778086	206785904	HCA56	1361	4622	1963	6585	19.8427	8.6063	-1.2051	0.4337
chr19	36233429	36236336	U2AF1L4	2075	2283	962	3245	6.4286	2.7664	-1.2165	0.4303
chr21	47720344	47743785	C21orf58	4684	7690	3229	10919	9.5926	4.1134	-1.2216	0.4288
chr12	7247150	7261793	C1RL	3655	7392	3092	10484	11.8169	5.0478	-1.2271	0.4272
chr6	150045452	150067688	NUP43	3852	7767	3227	10994	11.7814	4.9988	-1.2369	0.4243
chr11	71164216	71212579	NADSYN1	5911	6379	2648	9027	6.3055	2.6731	-1.2381	0.4239
chr17	42253353	42264082	C17orf65	2243	1975	819	2794	5.1448	2.1788	-1.2396	0.4235
chr2	85825670	85829821	TMEM150A	2421	810	328	1138	1.9549	0.8084	-1.2739	0.4135
chr17	42248073	42256451	ASB16	2139	1825	737	2562	4.9852	2.0559	-1.2778	0.4124
chr17	19641299	19651746	ALDH3A1	4054	1910	768	2678	2.7528	1.1304	-1.2841	0.4106
chr16	70789000	70807145	hCG_1998535	2180	392	157	549	1.0506	0.4297	-1.2898	0.409
chr14	74318533	74352166	PTGR2	2679	2699	1080	3779	5.8865	2.4055	-1.2911	0.4086
chr10	70046784	70066660	mawbp	2375	680	272	952	1.6729	0.6834	-1.2916	0.4085
chr17	48046561	48052322	DLX4	2316	2213	882	3095	5.583	2.2724	-1.2968	0.407
chr9	99794939	99822167	CTSL2	2384	3430	1354	4784	8.4065	3.389	-1.3107	0.4031
chr1	2518248	2522902	C1orf93	2796	1444	568	2012	3.0176	1.2122	-1.3158	0.4017
chr1	45274153	45279801	BTBD19	1637	684	269	953	2.4414	0.9805	-1.3161	0.4016
chr19	45174723	45187625	CEACAM19	2246	1473	578	2051	3.832	1.5356	-1.3193	0.4007
chr16	1823228	1826340	EME2	1436	1150	447	1597	4.6792	1.8574	-1.333	0.3969
chr20	58438618	58507209	SYCP2	5479	4591	1783	6374	4.8959	1.9418	-1.3342	0.3966
chr16	56899118	56949760	SLC12A3	5565	31793	12346	44139	33.3806	13.2378	-1.3344	0.3966
chr1	205350512	205391181	LEMD1	921	267	103	370	1.6939	0.6673	-1.3439	0.394
chr22	24376140	24384284	GSTT1	2155	11623	4480	16103	31.5137	12.4046	-1.3451	0.3936
chr11	119039436	119052066	DLNB26	2599	3443	1325	4768	7.7403	3.042	-1.3474	0.393
chr15	66797430	66841816	ZWILCH	3271	9591	3668	13259	17.1321	6.6912	-1.3564	0.3906
chr12	56618124	56623637	OBFC2B	1782	6762	2571	9333	22.1715	8.6089	-1.3648	0.3883
chr12	121458094	121476780	OASL	1820	2555	962	3517	8.2025	3.154	-1.3789	0.3845
chr1	167510252	167523056	CREG1	2023	6220	2320	8540	17.9648	6.843	-1.3925	0.3809
chr22	38474144	38479170	SLC16A8	1895	634	233	867	1.9548	0.7337	-1.4138	0.3753
chr11	119039436	119054723	NLRX1	4126	5470	2000	7470	7.7462	2.8924	-1.4212	0.3734
chr8	49984902	49988641	C8orf22	1264	13218	4736	17954	61.1008	22.3572	-1.4504	0.3659
chr17	4835591	4838324	GP1BA	2461	1590	569	2159	3.775	1.3796	-1.4522	0.3655
chr12	51318802	51324574	DKFZp586A0522	1189	8737	3117	11854	42.9347	15.6426	-1.4567	0.3643
chr10	104590289	104597290	CYP17A1	1868	543	192	735	1.6984	0.6133	-1.4695	0.3611
chr16	84328400	84363446	WFDC1	1374	8029	2828	10857	34.1431	12.2814	-1.4751	0.3597
chr12	51318533	51326299	METTL7A	3389	16066	5655	21721	27.699	9.9567	-1.4761	0.3595
chr1	153533586	153538306	S100A2	960	925	322	1247	5.6299	2.0014	-1.4921	0.3555
chr7	16832265	16844738	AGR2	981	916	305	1221	5.4558	1.8552	-1.5562	0.34
chr10	22605298	22609236	COMMD3	1739	3246	1047	4293	10.9063	3.5925	-1.6021	0.3294
chr1	6266188	6281351	RNF207	5692	7237	2245	9482	7.4289	2.3534	-1.6584	0.3168
chr1	156776034	156786640	SH2D2A	1845	486	146	632	1.5391	0.4722	-1.7047	0.3068
chr20	31755959	31769223	C20orf70	1052	373	111	484	2.0717	0.6296	-1.7183	0.3039
chr6	3045617	3046032	FAM136B	415	111	33	144	1.5628	0.4745	-1.7197	0.3036
chr1	154991004	155006257	DCST2	2485	731	214	945	1.7188	0.5139	-1.7419	0.299
chr22	42321035	42322821	TNFRSF13C	937	2213	631	2844	13.7997	4.0183	-1.78	0.2912
chr7	16840477	16844738	hAG-2/R	1130	330	90	420	1.7063	0.4752	-1.8442	0.2785
chr19	12907634	12912694	PRDX2	1810	65447	17514	82961	211.271	57.7378	-1.8715	0.2733
chr2	132552533	132559234	C2orf27B	1325	338	87	425	1.4905	0.3918	-1.9276	0.2629
chr3	158384203	158390482	LXN	1122	1079	264	1343	5.619	1.404	-2.0008	0.2499
chr8	144915770	144924200	NRBP2	4507	25319	5875	31194	32.8237	7.7781	-2.0772	0.237
chr12	91539035	91576806	DCN	2569	558	126	684	1.2691	0.2927	-2.1165	0.2306
chr8	144915916	144919346	pp9320	2570	12371	2791	15162	28.1255	6.4801	-2.1178	0.2304
